# Supplementary material for: Multiplexed ISSR genotyping by sequencing distinguishes two precious coral species (Anthozoa: Octocorallia: Coralliidae) that share a mitochondrial haplotype
Source: PeerJ. 2019 Oct 4;7:e7769. doi: 10.7717/peerj.7769 (PMC6779117; doi:10.7717/peerj.7769)
Supplement: Supplemental Information 1 [file peerj-07-7769-s001.xlsx]

## Sheet: batch_1.structure
		13_9	28_26	28_27	44_3	44_29	44_32	44_72	52_2	52_8	52_10	65_27	65_44	65_52	65_58	103_26	103_45	123_37	123_52	145_27	145_44	145_45	145_73	146_52	146_56	146_66	198_15	198_74	223_45	223_47	232_4	232_9	232_26	232_39	232_78	244_51	271_77	288_9	288_39	288_65	288_69	335_49	365_0	365_3	365_55	365_66	374_1	374_19	374_30
OTSH02	1	0	3	1	0	0	0	0	0	0	0	2	3	2	1	3	2	0	0	1	1	4	4	1	3	3	3	2	3	3	0	0	0	0	0	0	0	0	0	0	0	0	1	2	3	1	2	2	3
OTSH02	1	0	3	1	0	0	0	0	0	0	0	2	3	2	1	3	2	0	0	1	1	4	4	1	3	3	3	2	3	3	0	0	0	0	0	0	0	0	0	0	0	0	1	2	3	1	2	3	3
CE-AMM001	1	3	3	2	4	3	1	1	2	2	4	2	3	2	1	3	2	1	1	1	1	4	4	1	3	3	3	2	3	3	2	4	1	4	3	3	2	4	1	1	1	2	1	2	3	1	2	2	3
CE-AMM001	1	3	3	2	4	3	1	1	2	2	4	2	3	2	1	3	2	1	1	1	1	4	4	1	3	3	3	2	3	3	2	4	1	4	3	3	2	4	1	3	1	2	1	2	3	1	2	3	3
CE-HTR001	1	3	0	0	2	3	1	1	2	2	4	2	3	2	1	0	0	0	0	1	1	4	4	0	0	0	0	0	3	3	4	2	1	4	3	3	0	4	1	1	1	2	0	0	0	0	2	3	3
CE-HTR001	1	3	0	0	4	3	1	1	2	2	4	4	3	2	1	0	0	0	0	1	1	4	4	0	0	0	0	0	3	3	4	2	1	4	3	3	0	4	1	1	1	2	0	0	0	0	2	3	3
CE-HTR002	1	3	3	2	0	0	0	0	2	2	4	0	0	0	0	0	0	1	1	1	1	4	4	0	0	0	0	0	0	0	2	4	1	4	3	0	0	0	0	0	0	0	0	0	0	0	2	2	3
CE-HTR002	1	3	3	2	0	0	0	0	2	2	4	0	0	0	0	0	0	1	1	1	1	4	4	0	0	0	0	0	0	0	2	4	1	4	3	0	0	0	0	0	0	0	0	0	0	0	2	3	3
CE-HTR003	1	3	3	2	0	0	0	0	0	0	0	2	3	2	1	0	0	0	0	1	1	4	4	1	3	3	3	2	0	0	4	2	1	4	3	0	2	4	1	3	1	2	1	2	3	1	2	2	3
CE-HTR003	1	3	3	2	0	0	0	0	0	0	0	2	3	2	1	0	0	0	0	1	1	4	4	1	3	3	3	2	0	0	4	2	1	4	3	0	2	4	1	3	1	2	1	2	3	1	2	3	3
CE-IGK003	1	0	3	2	0	0	0	0	2	2	4	4	3	2	1	3	2	0	0	1	1	4	4	0	0	0	0	0	0	0	4	2	1	4	3	0	2	3	3	1	2	2	0	0	0	0	2	3	3
CE-IGK003	1	0	3	2	0	0	0	0	2	2	4	4	3	2	1	3	2	0	0	1	1	4	4	0	0	0	0	0	0	0	4	2	1	4	3	0	2	3	3	1	2	2	0	0	0	0	2	3	3
CE-IGK006	1	0	3	2	0	0	0	0	2	2	4	0	0	0	0	0	0	0	0	1	1	4	4	0	0	0	0	0	3	3	2	4	1	4	3	3	0	0	0	0	0	2	0	0	0	0	0	0	0
CE-IGK006	1	0	3	2	0	0	0	0	2	2	4	0	0	0	0	0	0	0	0	1	1	4	4	0	0	0	0	0	3	3	2	4	3	4	3	3	0	0	0	0	0	2	0	0	0	0	0	0	0
CE-IGK007	1	3	0	0	2	3	1	1	2	2	4	2	3	2	1	3	2	0	0	1	1	4	4	1	3	3	0	0	3	1	0	0	0	0	0	3	2	0	0	0	0	0	0	0	0	0	2	3	3
CE-IGK007	1	3	0	0	4	3	1	1	2	2	4	2	3	2	1	3	2	0	0	1	1	4	4	1	3	3	0	0	3	3	0	0	0	0	0	3	2	0	0	0	0	0	0	0	0	0	2	3	3
CE-IGK008	1	0	3	1	4	3	1	1	0	0	0	0	0	0	0	0	0	0	0	1	1	4	4	1	3	1	0	0	3	3	2	4	0	4	3	3	0	4	1	1	0	0	1	2	3	1	0	0	0
CE-IGK008	1	0	3	2	4	3	1	1	0	0	0	0	0	0	0	0	0	0	0	1	1	4	4	1	3	3	0	0	3	3	2	4	0	4	3	3	0	4	1	1	0	0	1	2	3	1	0	0	0
CE-IGK010	1	3	0	0	2	3	1	4	0	0	0	2	3	2	1	0	0	1	1	1	1	4	4	0	0	0	0	0	3	3	0	0	0	0	0	0	0	0	0	0	0	0	1	2	3	1	2	2	3
CE-IGK010	1	3	0	0	2	4	1	4	0	0	0	2	3	2	1	0	0	1	1	1	1	4	4	0	0	0	0	0	3	3	0	0	0	0	0	0	0	0	0	0	0	0	1	2	3	1	2	3	3
CE-IKM001	1	0	3	2	0	0	0	0	0	0	0	0	0	0	0	3	2	0	0	0	0	0	0	0	0	0	0	0	0	0	4	2	1	4	3	3	2	4	1	1	1	2	1	2	3	1	2	3	3
CE-IKM001	1	0	3	2	0	0	0	0	0	0	0	0	0	0	0	3	2	0	0	0	0	0	0	0	0	0	0	0	0	0	4	2	1	4	3	3	2	4	1	1	1	2	1	2	3	1	2	3	3
CE-IOU005	1	3	0	0	0	3	1	1	4	2	4	2	3	2	1	0	0	1	1	1	1	4	4	1	3	3	0	0	3	1	2	4	1	4	0	3	0	0	0	0	0	0	0	0	0	0	0	0	0
CE-IOU005	1	3	0	0	0	3	1	1	4	2	4	2	3	2	1	0	0	1	1	1	1	4	4	1	3	3	0	0	3	3	2	4	1	4	0	3	0	0	0	0	0	0	0	0	0	0	0	0	0
CE-IOU010	1	0	0	0	2	3	1	1	2	2	4	4	3	2	1	0	0	0	0	1	1	4	4	1	3	3	0	0	3	3	0	0	0	0	0	3	0	0	0	0	0	0	1	2	3	1	2	2	3
CE-IOU010	1	0	0	0	4	3	1	1	2	2	4	4	3	2	1	0	0	0	0	1	1	4	4	1	3	3	0	0	3	3	0	0	0	0	0	3	0	0	0	0	0	0	1	2	3	1	2	3	3
CE-IZN001	1	0	3	1	0	0	0	0	2	2	4	2	3	2	1	3	2	0	0	0	0	0	0	1	3	3	0	0	0	0	2	4	1	4	3	3	2	4	1	1	1	0	1	2	3	1	2	2	3
CE-IZN001	1	0	3	1	0	0	0	0	2	2	4	2	3	2	1	3	2	0	0	0	0	0	0	1	3	3	0	0	0	0	2	4	3	4	3	3	2	4	1	1	1	0	1	2	3	1	2	2	3
CE-NKN001	1	0	0	0	2	3	1	1	0	0	0	2	3	2	1	3	2	3	3	1	1	4	4	0	0	0	0	0	3	1	0	0	0	0	0	3	2	4	1	1	1	0	0	0	0	0	2	3	3
CE-NKN001	1	0	0	0	4	3	1	1	0	0	0	2	3	2	1	3	2	3	3	1	1	4	4	0	0	0	0	0	3	3	0	0	0	0	0	3	2	4	1	1	1	0	0	0	0	0	2	3	3
CE-TAK001	1	0	0	0	0	0	0	0	2	2	4	0	0	0	0	0	0	1	1	1	1	4	4	0	0	0	0	0	3	1	0	0	0	0	0	3	0	4	1	3	1	0	1	2	3	1	0	0	0
CE-TAK001	1	0	0	0	0	0	0	0	2	2	4	0	0	0	0	0	0	1	1	1	1	4	4	0	0	0	0	0	3	3	0	0	0	0	0	3	0	4	1	3	1	0	1	2	3	1	0	0	0
CE-TAK003	1	0	3	2	0	0	0	0	0	0	0	0	0	0	0	0	0	1	1	1	1	4	4	1	3	3	0	0	3	3	0	0	0	0	0	3	0	0	0	0	0	0	0	0	0	0	2	0	3
CE-TAK003	1	0	3	2	0	0	0	0	0	0	0	0	0	0	0	0	0	1	1	1	1	4	4	1	3	3	0	0	3	3	0	0	0	0	0	3	0	0	0	0	0	0	0	0	0	0	2	0	3
CE-TKN002	1	0	3	2	4	3	1	1	2	2	4	0	0	0	0	0	0	1	1	1	1	4	4	0	0	0	0	0	3	3	0	0	0	0	0	0	0	0	0	0	0	0	1	2	3	1	0	0	0
CE-TKN002	1	0	3	2	4	3	1	1	2	2	4	0	0	0	0	0	0	1	1	1	1	4	4	0	0	0	0	0	3	3	0	0	0	0	0	0	0	0	0	0	0	0	1	2	3	1	0	0	0
CE-TKN003	1	0	0	0	4	3	1	1	0	0	0	0	0	0	0	3	2	1	1	1	1	4	4	1	3	3	0	0	3	3	0	0	0	0	0	3	4	4	1	1	1	0	1	2	3	1	0	0	0
CE-TKN003	1	0	0	0	4	3	1	1	0	0	0	0	0	0	0	3	2	1	1	1	1	4	4	1	3	3	0	0	3	3	0	0	0	0	0	3	4	4	1	1	1	0	1	2	3	1	0	0	0
CE-TNG002	1	3	3	2	0	0	0	0	2	2	4	2	3	2	1	0	0	1	1	0	0	0	0	1	3	3	0	0	3	3	0	0	0	0	0	0	2	4	1	1	1	0	1	2	3	0	2	2	3
CE-TNG002	1	3	3	2	0	0	0	0	2	2	4	2	3	2	1	0	0	1	1	0	0	0	0	1	3	3	0	0	3	3	0	0	0	0	0	0	4	4	1	1	1	0	1	2	3	0	2	3	3
CE-TNG005	1	0	0	0	2	3	1	1	4	2	4	0	0	0	0	3	2	1	1	1	1	4	4	1	3	3	0	0	3	3	2	4	1	4	3	3	0	4	1	3	1	0	0	0	0	0	2	3	3
CE-TNG005	1	0	0	0	4	3	1	1	4	2	4	0	0	0	0	3	2	1	1	1	1	4	4	1	3	3	0	0	3	3	2	4	1	4	3	3	0	4	1	3	1	0	0	0	0	0	2	3	3
CE-TNG006	1	3	0	0	0	0	0	0	4	2	4	2	3	2	1	3	2	1	1	0	0	0	0	1	3	3	0	0	3	1	0	0	0	0	0	3	2	0	0	0	0	0	1	2	3	1	2	3	3
CE-TNG006	1	3	0	0	0	0	0	0	4	2	4	2	3	2	1	3	2	1	1	0	0	0	0	1	3	3	0	0	3	3	0	0	0	0	0	3	2	0	0	0	0	0	1	2	3	1	2	3	3
CE-TRM004	1	0	0	0	2	3	1	1	2	2	4	0	0	0	0	3	2	1	1	1	1	4	4	1	3	1	0	0	3	3	0	0	0	0	0	0	0	0	0	0	0	0	1	2	3	1	2	3	3
CE-TRM004	1	0	0	0	4	3	1	1	2	2	4	0	0	0	0	3	2	1	1	1	1	4	4	1	3	3	0	0	3	3	0	0	0	0	0	0	0	0	0	0	0	0	1	2	3	1	2	3	3
CE-YAK002	1	0	1	1	0	0	0	0	0	0	0	0	0	0	0	3	2	1	1	1	1	4	4	1	3	3	0	0	0	0	2	4	1	4	3	0	0	4	1	1	1	0	1	2	3	1	2	2	3
CE-YAK002	1	0	3	1	0	0	0	0	0	0	0	0	0	0	0	3	2	1	1	1	1	4	4	1	3	3	0	0	0	0	2	4	1	4	3	0	0	4	1	1	1	0	1	2	3	1	2	3	3
CE-YAK003	1	0	3	2	0	0	0	0	0	0	0	2	3	2	1	3	2	0	0	1	1	4	4	1	3	3	0	0	3	3	4	2	1	4	3	3	2	0	0	0	0	0	1	2	3	1	2	3	3
CE-YAK003	1	0	3	2	0	0	0	0	0	0	0	2	3	2	1	3	2	0	0	1	1	4	4	1	3	3	0	0	3	3	4	2	1	4	3	3	4	0	0	0	0	0	1	2	3	1	2	3	3
CE-YAK004	1	0	3	2	4	3	1	1	0	0	0	2	3	2	1	3	2	1	1	1	1	4	4	0	0	0	3	2	3	1	0	0	0	0	0	3	0	0	0	0	0	0	0	0	0	0	2	0	3
CE-YAK004	1	0	3	2	4	3	1	1	0	0	0	2	3	2	1	3	2	1	1	1	1	4	4	0	0	0	3	2	3	3	0	0	0	0	0	3	0	0	0	0	0	0	0	0	0	0	2	0	3
CE-YAK006	1	3	3	1	2	3	1	4	0	0	0	2	3	2	1	0	0	0	0	0	0	0	0	1	3	3	0	0	3	3	4	2	1	4	3	0	2	0	0	0	0	2	1	2	3	1	2	2	3
CE-YAK006	1	3	3	2	2	4	1	4	0	0	0	2	3	2	1	0	0	0	0	0	0	0	0	1	3	3	0	0	3	3	4	2	1	4	3	0	2	0	0	0	0	2	1	2	3	1	2	3	3
CK-IOU002	2	3	0	0	0	0	0	0	4	2	4	2	3	2	1	1	4	0	0	3	4	2	2	1	3	3	3	2	0	0	0	0	0	0	0	0	0	4	1	1	1	0	4	4	2	3	2	3	3
CK-IOU002	2	3	0	0	0	0	0	0	4	2	4	2	3	2	1	1	4	0	0	3	4	2	2	3	3	3	3	2	0	0	0	0	0	0	0	0	0	4	1	1	1	0	4	4	2	3	2	3	3
CK-IOU003	2	0	0	0	0	0	0	0	4	2	4	0	0	0	0	0	0	0	0	3	4	2	2	0	0	0	0	0	2	3	0	0	0	0	0	3	0	0	0	0	0	2	0	0	0	0	0	0	0
CK-IOU003	2	0	0	0	0	0	0	0	4	2	4	0	0	0	0	0	0	0	0	3	4	2	2	0	0	0	0	0	2	3	0	0	0	0	0	3	0	0	0	0	0	2	0	0	0	0	0	0	0
CK-IOU004	2	3	0	0	0	0	0	0	4	2	4	2	3	2	1	1	4	3	3	3	4	2	2	1	3	3	3	2	2	3	0	0	0	0	0	3	0	4	1	1	1	2	0	0	0	0	2	3	3
CK-IOU004	2	3	0	0	0	0	0	0	4	2	4	2	3	2	1	3	4	3	3	3	4	2	2	1	3	3	3	2	2	3	0	0	0	0	0	3	0	4	1	1	1	2	0	0	0	0	4	3	3
CK-IOU006	2	0	1	1	0	0	0	0	4	2	4	2	3	2	1	1	4	3	1	0	0	0	0	0	0	0	3	2	0	0	0	0	0	0	0	3	0	4	1	1	1	0	0	0	0	0	0	0	0
CK-IOU006	2	0	3	1	0	0	0	0	4	2	4	2	3	2	1	1	4	3	3	0	0	0	0	0	0	0	3	2	0	0	0	0	0	0	0	3	0	4	1	1	1	0	0	0	0	0	0	0	0
CK-IOU007	2	0	0	0	2	3	1	4	0	0	0	0	0	0	0	3	4	0	0	3	4	2	2	3	3	3	3	2	0	0	0	0	0	0	0	3	2	4	1	1	1	4	0	0	0	0	2	3	3
CK-IOU007	2	0	0	0	2	3	4	4	0	0	0	0	0	0	0	3	4	0	0	3	4	2	2	3	3	3	3	2	0	0	0	0	0	0	0	3	2	4	1	1	1	4	0	0	0	0	2	3	3
CK-TAK001	2	2	0	0	2	3	1	4	4	2	4	2	3	2	1	0	0	0	0	3	4	2	2	0	0	0	0	0	0	0	0	0	0	0	0	3	0	0	0	0	0	2	0	0	0	0	2	3	0
CK-TAK001	2	3	0	0	2	3	1	4	4	2	4	2	3	2	1	0	0	0	0	3	4	2	2	0	0	0	0	0	0	0	0	0	0	0	0	3	0	0	0	0	0	2	0	0	0	0	2	3	0
CK-TAK002	2	3	0	0	2	3	1	4	4	4	4	2	3	2	1	0	0	3	3	0	0	0	0	0	3	3	0	0	0	0	0	0	0	0	0	3	2	0	0	0	0	2	0	0	0	0	0	0	0
CK-TAK002	2	3	0	0	2	3	1	4	4	4	4	2	3	2	1	0	0	3	3	0	0	0	0	0	3	3	0	0	0	0	0	0	0	0	0	3	2	0	0	0	0	2	0	0	0	0	0	0	0
CK-TAK003	2	3	1	1	2	3	1	4	4	2	4	2	3	2	1	0	0	0	0	3	4	2	2	0	0	0	0	0	2	3	4	2	1	4	3	3	0	0	0	0	0	0	0	0	0	0	2	3	3
CK-TAK003	2	3	1	1	2	3	1	4	4	2	4	2	3	2	1	0	0	0	0	3	4	2	2	0	0	0	0	0	2	3	4	2	1	4	3	3	0	0	0	0	0	0	0	0	0	0	2	3	3
CK-TAK004	2	0	0	0	2	3	1	4	4	2	4	0	0	0	0	1	4	0	0	3	4	2	2	0	0	0	3	2	2	3	0	0	0	0	0	1	0	4	1	1	1	0	0	0	0	0	2	3	3
CK-TAK004	2	0	0	0	2	3	4	4	4	2	4	0	0	0	0	1	4	0	0	3	4	2	2	0	0	0	3	2	2	3	0	0	0	0	0	3	0	4	1	1	1	0	0	0	0	0	2	3	3
CK-TAK005	2	3	1	1	2	3	1	4	0	0	0	2	3	2	1	0	0	0	0	3	4	2	2	1	3	3	3	2	2	3	4	2	1	4	3	3	2	4	1	1	1	0	4	4	2	3	2	3	3
CK-TAK005	2	3	1	1	2	3	4	4	0	0	0	2	3	2	1	0	0	0	0	3	4	2	2	1	3	3	3	2	2	3	4	2	1	4	3	3	2	4	1	1	1	0	4	4	2	3	2	3	3
CK-TAK006	2	3	0	0	2	3	0	4	4	2	4	2	3	2	1	0	4	0	0	3	4	2	2	1	3	3	3	2	0	0	0	0	0	0	0	0	0	4	1	1	1	2	0	0	0	0	2	3	3
CK-TAK006	2	3	0	0	2	3	0	4	4	2	4	2	3	2	1	0	4	0	0	3	4	2	2	1	3	3	3	2	0	0	0	0	0	0	0	0	0	4	1	1	1	2	0	0	0	0	2	3	3
CK-TAK008	2	0	3	1	2	3	1	4	4	2	4	0	0	0	0	1	4	3	3	0	0	0	0	1	3	3	0	0	2	3	2	4	1	1	3	0	0	0	0	0	0	2	0	0	0	0	0	0	0
CK-TAK008	2	0	3	1	2	3	1	4	4	2	4	0	0	0	0	3	4	3	3	0	0	0	0	3	3	3	0	0	2	3	2	4	1	4	3	0	0	0	0	0	0	2	0	0	0	0	0	0	0
CK-TNG002	2	0	1	1	2	3	1	4	4	2	2	2	3	2	1	1	4	3	3	0	0	0	0	3	3	3	0	0	2	3	0	0	0	0	0	3	2	4	1	1	1	0	0	0	0	0	2	3	3
CK-TNG002	2	0	1	1	2	3	4	4	4	2	4	2	3	2	1	3	4	3	3	0	0	0	0	3	3	3	0	0	2	3	0	0	0	0	0	3	2	4	1	1	1	0	0	0	0	0	2	3	3
CKA01	2	3	1	1	2	3	1	4	0	0	0	2	3	2	1	0	0	3	3	3	4	2	2	1	3	3	0	0	2	3	4	2	1	4	3	0	2	4	1	1	1	0	4	4	2	3	2	3	3
CKA01	2	3	3	1	2	3	4	4	0	0	0	2	3	2	1	0	0	3	3	3	4	2	2	3	3	3	0	0	2	3	4	2	1	4	3	0	2	4	1	1	1	0	4	4	2	3	2	3	3
CKF-Q-O	2	0	0	0	2	3	1	4	0	0	0	2	3	1	1	1	4	3	3	3	4	2	2	0	0	0	0	0	0	0	4	2	1	4	3	3	2	4	1	1	1	2	4	4	2	3	2	3	3
CKF-Q-O	2	0	0	0	2	3	4	4	0	0	0	2	3	2	1	3	4	3	3	3	4	2	2	0	0	0	0	0	0	0	4	2	1	4	3	3	2	4	1	1	1	2	4	4	2	3	2	3	3
CKF02	2	3	1	1	2	3	1	4	4	2	4	2	3	2	1	0	0	0	0	0	0	0	0	1	3	3	3	2	2	3	0	0	0	0	0	0	2	0	0	0	0	0	4	4	2	3	0	0	0
CKF02	2	3	1	1	2	3	4	4	4	2	4	2	3	2	1	0	0	0	0	0	0	0	0	1	3	3	3	2	2	3	0	0	0	0	0	0	2	0	0	0	0	0	4	4	2	3	0	0	0
CKF05	2	3	1	1	2	3	1	4	0	0	0	0	0	0	0	0	0	0	0	3	4	2	2	1	3	3	0	0	0	0	4	2	1	4	3	0	2	4	1	1	1	2	4	4	2	3	0	0	0
CKF05	2	3	3	1	2	3	1	4	0	0	0	0	0	0	0	0	0	0	0	3	4	2	2	1	3	3	0	0	0	0	4	2	1	4	3	0	2	4	1	1	1	2	4	4	2	3	0	0	0
CKF06	2	0	1	1	0	0	0	0	4	2	4	2	3	2	1	1	4	1	1	0	0	0	0	1	3	3	0	0	0	0	4	2	1	4	1	3	2	4	1	1	1	0	4	4	2	3	2	3	1
CKF06	2	0	1	1	0	0	0	0	4	2	4	2	3	2	1	3	4	1	1	0	0	0	0	1	3	3	0	0	0	0	4	2	1	4	3	3	2	4	1	1	1	0	4	4	2	3	2	3	1
CKF07	2	3	0	0	2	3	1	4	4	2	4	0	0	0	0	1	4	3	3	0	0	0	0	1	3	3	1	4	0	0	2	4	1	4	3	3	2	4	1	1	1	2	4	4	0	3	2	3	3
CKF07	2	3	0	0	2	3	1	4	4	2	4	0	0	0	0	1	4	3	3	0	0	0	0	1	3	3	1	4	0	0	2	4	1	4	3	3	2	4	1	1	1	2	4	4	0	3	2	3	3
CKF09	2	3	1	1	0	0	0	0	0	0	0	2	3	2	1	1	4	0	0	3	4	2	4	1	3	3	3	2	0	0	4	2	1	4	3	3	2	4	1	1	1	4	4	4	2	3	2	3	3
CKF09	2	3	3	1	0	0	0	0	0	0	0	2	3	2	1	1	4	0	0	3	4	2	4	1	3	3	3	2	0	0	4	2	1	4	3	3	2	4	1	1	1	4	4	4	2	3	2	3	3
CKF10	2	3	1	1	2	3	1	4	4	2	4	0	0	0	0	3	4	0	0	0	0	0	0	1	3	3	3	2	2	3	0	0	0	0	0	0	2	4	1	1	1	2	4	4	2	3	0	0	0
CKF10	2	3	3	1	2	3	4	4	4	4	4	0	0	0	0	3	4	0	0	0	0	0	0	3	3	3	3	2	2	3	0	0	0	0	0	0	2	4	1	1	1	2	4	4	2	3	0	0	0
CKF18	2	0	3	1	0	0	0	0	0	0	0	2	3	2	1	0	0	0	0	3	4	2	2	0	0	0	3	2	0	0	4	2	1	4	3	0	2	4	1	1	1	2	4	4	2	3	2	3	3
CKF18	2	0	3	2	0	0	0	0	0	0	0	2	3	2	1	0	0	0	0	3	4	2	2	0	0	0	3	2	0	0	4	2	1	4	3	0	2	4	1	1	1	2	4	4	2	3	2	3	3
CKSH01	2	3	1	1	2	3	1	4	4	2	4	2	3	2	1	0	0	0	0	3	4	2	2	1	3	3	3	2	2	3	0	0	0	0	0	0	2	4	1	1	1	0	0	0	0	0	2	3	3
CKSH01	2	3	3	1	2	3	1	4	4	2	4	2	3	2	1	0	0	0	0	3	4	2	2	1	3	3	3	2	2	3	0	0	0	0	0	0	2	4	1	1	1	0	0	0	0	0	2	3	3
CKSH02	2	0	0	0	2	3	1	4	4	2	4	2	3	2	1	1	4	3	3	0	0	0	0	1	3	3	0	0	0	0	0	0	0	0	0	3	2	4	1	1	1	2	0	0	0	0	0	0	0
CKSH02	2	0	0	0	2	3	1	4	4	2	4	2	3	2	1	3	4	3	3	0	0	0	0	1	3	3	0	0	0	0	0	0	0	0	0	3	2	4	1	1	1	2	0	0	0	0	0	0	0
CKSH03	2	3	0	0	0	0	0	0	4	2	4	2	3	2	1	1	4	1	1	0	0	0	0	1	3	3	3	2	2	3	4	2	1	4	3	3	0	0	0	0	0	0	0	0	0	0	2	3	3
CKSH03	2	3	0	0	0	0	0	0	4	4	4	2	3	2	1	1	4	1	1	0	0	0	0	3	3	3	3	2	2	3	4	2	1	4	3	3	0	0	0	0	0	0	0	0	0	0	2	3	3
CKSH05	2	3	3	1	0	0	0	0	4	2	4	0	0	0	0	1	4	0	0	3	4	2	2	1	3	3	0	0	2	3	0	0	0	0	0	3	2	4	1	1	1	4	4	4	2	3	2	3	3
CKSH05	2	3	3	1	0	0	0	0	4	2	4	0	0	0	0	3	4	0	0	3	4	2	2	1	3	3	0	0	2	3	0	0	0	0	0	3	2	4	1	1	1	4	4	4	2	3	2	3	3
CKSH06	2	3	3	1	0	0	0	0	0	0	0	0	0	0	0	1	4	0	0	3	4	2	2	1	3	3	3	2	2	3	2	4	1	4	3	3	2	4	1	1	1	2	4	4	2	3	0	0	0
CKSH06	2	3	3	2	0	0	0	0	0	0	0	0	0	0	0	1	4	0	0	3	4	2	2	1	3	3	3	2	2	3	2	4	1	4	3	3	2	4	1	1	1	2	4	4	2	3	0	0	0
CKSH07	2	3	3	1	0	0	0	0	4	2	4	0	0	0	0	0	0	3	3	0	0	0	0	1	3	3	3	2	2	3	2	4	1	4	3	3	0	0	0	0	0	2	0	0	0	0	0	0	0
CKSH07	2	3	3	2	0	0	0	0	4	2	4	0	0	0	0	0	0	3	3	0	0	0	0	1	3	3	3	2	2	3	2	4	1	4	3	3	0	0	0	0	0	2	0	0	0	0	0	0	0
CKSH08	2	3	0	0	0	0	0	0	0	0	0	0	0	0	0	1	4	0	0	3	4	2	2	1	3	3	3	2	2	3	2	4	1	4	3	3	0	4	1	1	1	2	4	4	2	3	0	0	0
CKSH08	2	3	0	0	0	0	0	0	0	0	0	0	0	0	0	1	4	0	0	3	4	2	2	1	3	3	3	2	2	3	2	4	1	4	3	3	0	4	1	1	1	2	4	4	2	3	0	0	0
CKSH09	2	0	1	1	2	3	1	4	4	2	4	0	0	0	0	1	4	0	0	3	4	2	2	0	0	0	3	2	2	3	4	2	1	4	3	3	2	0	0	0	0	2	4	4	2	3	2	3	3
CKSH09	2	0	3	1	2	3	1	4	4	2	4	0	0	0	0	3	4	0	0	3	4	2	4	0	0	0	3	2	2	3	4	2	1	4	3	3	2	0	0	0	0	2	4	4	2	3	2	3	3
CKSH10	2	2	0	0	2	3	1	4	4	2	4	2	3	2	1	0	0	3	3	0	0	0	0	0	0	0	3	2	2	3	0	0	0	0	0	3	2	0	0	0	0	2	4	4	2	3	2	3	3
CKSH10	2	3	0	0	2	3	1	4	4	2	4	2	3	2	1	0	0	3	3	0	0	0	0	0	0	0	3	2	2	3	0	0	0	0	0	3	2	0	0	0	0	2	4	4	2	3	2	3	3
CKSH11	2	0	1	1	2	3	1	4	0	0	0	0	0	0	0	1	4	0	0	3	4	2	2	1	3	3	0	0	0	0	0	0	0	0	0	3	2	4	1	1	1	0	4	4	2	3	2	3	3
CKSH11	2	0	3	1	2	3	1	4	0	0	0	0	0	0	0	3	4	0	0	3	4	2	2	1	3	3	0	0	0	0	0	0	0	0	0	3	2	4	1	1	1	0	4	4	2	3	4	3	3
CKSH12	2	0	1	1	2	3	1	4	0	0	0	2	3	2	1	0	0	3	3	3	4	2	2	1	3	3	0	0	2	3	4	2	1	4	3	3	2	4	1	1	1	0	4	4	2	3	0	0	0
CKSH12	2	0	3	1	2	3	1	4	0	0	0	2	3	2	1	0	0	3	3	3	4	2	2	1	3	3	0	0	2	3	4	2	1	4	3	3	2	4	1	1	1	0	4	4	2	3	0	0	0
CKSH15	2	0	1	1	2	3	1	1	4	2	4	0	0	0	0	3	4	0	0	3	4	2	2	0	0	0	3	2	0	0	0	0	0	0	0	1	2	0	0	0	0	0	4	4	2	3	2	3	3
CKSH15	2	0	1	1	2	3	1	1	4	2	4	0	0	0	0	3	4	0	0	3	4	2	2	0	0	0	3	2	0	0	0	0	0	0	0	3	2	0	0	0	0	0	4	4	2	3	2	3	3
CKSH16	2	0	1	1	2	3	1	4	0	0	0	0	0	0	0	1	4	0	0	3	4	2	4	0	0	0	1	4	2	3	4	2	1	4	3	3	2	4	1	1	1	2	4	4	2	3	0	0	0
CKSH16	2	0	1	1	2	3	1	4	0	0	0	0	0	0	0	3	4	0	0	3	4	2	4	0	0	0	1	4	2	3	4	2	1	4	3	3	2	4	1	1	1	2	4	4	2	3	0	0	0
CKSH17	2	3	1	1	0	0	0	0	4	2	4	2	3	2	1	0	0	3	3	0	0	0	0	1	3	3	3	2	0	0	0	0	0	0	0	3	2	4	1	1	1	2	4	4	2	3	2	3	3
CKSH17	2	3	3	1	0	0	0	0	4	2	4	2	3	2	1	0	0	3	3	0	0	0	0	3	3	3	3	2	0	0	0	0	0	0	0	3	2	4	1	1	1	2	4	4	2	3	2	3	3
CKSH18	2	3	3	1	0	0	0	0	0	0	0	2	3	2	1	0	0	0	0	0	0	0	0	0	0	0	3	2	0	0	4	2	1	4	3	3	2	0	0	0	0	2	4	4	2	3	2	3	3
CKSH18	2	3	3	2	0	0	0	0	0	0	0	2	3	2	1	0	0	0	0	0	0	0	0	0	0	0	3	2	0	0	4	2	1	4	3	3	2	0	0	0	0	2	4	4	2	3	2	3	3
CKSH19	2	2	1	1	2	3	1	4	4	2	4	2	1	2	4	1	4	0	0	0	0	0	0	1	3	3	3	2	2	3	4	2	1	4	3	3	2	4	1	1	1	0	4	4	2	3	0	0	0
CKSH19	2	3	1	1	2	3	4	4	4	2	4	2	1	2	4	1	4	0	0	0	0	0	0	1	3	3	3	2	2	3	4	2	1	4	3	3	2	4	1	1	1	0	4	4	2	3	0	0	0
CKSH20	2	0	0	0	2	3	1	4	4	2	4	0	0	0	0	0	0	3	3	0	0	0	0	1	3	3	3	2	0	0	4	2	1	4	3	3	0	4	1	1	1	2	4	4	2	3	2	3	3
CKSH20	2	0	0	0	2	3	4	4	4	2	4	0	0	0	0	0	0	3	3	0	0	0	0	1	3	3	3	2	0	0	4	2	1	4	3	3	0	4	1	1	1	2	4	4	2	3	2	3	3
CKSH21	2	3	1	1	0	0	0	0	0	0	0	0	0	0	0	0	0	3	3	0	0	0	0	1	3	3	0	0	0	0	0	0	0	0	0	3	2	4	1	1	1	4	4	4	2	3	0	0	0
CKSH21	2	3	3	1	0	0	0	0	0	0	0	0	0	0	0	0	0	3	3	0	0	0	0	1	3	3	0	0	0	0	0	0	0	0	0	3	2	4	1	1	1	4	4	4	2	3	0	0	0
CKSH22	2	3	3	1	2	3	1	4	0	0	0	0	0	0	0	1	4	0	0	3	4	2	2	3	3	3	3	2	0	0	4	2	1	4	3	3	2	4	1	1	1	4	4	4	2	3	2	3	3
CKSH22	2	3	3	1	2	3	4	4	0	0	0	0	0	0	0	3	4	0	0	3	4	2	2	3	3	3	3	2	0	0	4	2	1	4	3	3	2	4	1	1	1	4	4	4	2	3	2	3	3
CKSH23	2	2	0	0	2	3	1	4	0	0	0	0	0	0	0	0	0	3	1	3	4	2	2	0	0	0	1	4	0	0	4	2	1	4	3	3	2	4	1	1	1	2	4	4	2	3	0	0	0
CKSH23	2	3	0	0	2	3	1	4	0	0	0	0	0	0	0	0	0	3	3	3	4	2	2	0	0	0	1	4	0	0	4	2	1	4	3	3	2	4	1	1	1	2	4	4	2	3	0	0	0
CKSH24	2	0	1	1	0	0	0	0	0	0	0	2	3	2	1	0	0	3	3	3	4	2	2	0	0	0	3	2	2	3	4	2	1	4	3	3	0	0	0	0	0	0	4	4	2	3	2	3	3
CKSH24	2	0	3	1	0	0	0	0	0	0	0	2	3	2	1	0	0	3	3	3	4	2	2	0	0	0	3	2	2	3	4	2	1	4	3	3	0	0	0	0	0	0	4	4	2	3	2	3	3
CKSH25	2	2	3	2	2	3	1	4	4	2	4	2	3	2	1	1	4	3	3	0	0	0	0	0	0	0	3	2	0	0	4	2	1	4	3	3	2	0	0	0	0	2	4	4	2	3	0	0	0
CKSH25	2	3	3	2	2	3	4	4	4	2	4	2	3	2	1	3	4	3	3	0	0	0	0	0	0	0	3	2	0	0	4	2	1	4	3	3	2	0	0	0	0	2	4	4	2	3	0	0	0
CKSH27	2	3	1	1	0	0	0	0	0	0	0	2	3	2	1	0	0	0	0	0	0	0	0	1	3	3	3	2	0	0	4	2	1	4	0	3	2	4	1	1	1	0	4	4	2	3	0	0	0
CKSH27	2	3	1	1	0	0	0	0	0	0	0	2	3	2	1	0	0	0	0	0	0	0	0	1	3	3	3	2	0	0	4	2	1	4	0	3	2	4	1	1	1	0	4	4	2	3	0	0	0
CKSH28	2	0	1	1	2	3	1	4	0	0	0	0	0	0	0	0	0	0	0	0	0	0	0	1	3	3	3	2	0	0	0	0	0	0	0	0	2	4	1	1	1	2	4	4	2	3	2	3	3
CKSH28	2	0	1	1	2	3	4	4	0	0	0	0	0	0	0	0	0	0	0	0	0	0	0	1	3	3	3	2	0	0	0	0	0	0	0	0	2	4	1	1	1	2	4	4	2	3	2	3	3
CKSH29	2	0	0	0	0	0	0	0	0	0	0	0	0	0	0	0	0	3	3	0	0	0	0	1	3	3	3	2	2	3	4	2	1	4	3	3	2	4	1	1	1	2	4	4	2	3	0	0	0
CKSH29	2	0	0	0	0	0	0	0	0	0	0	0	0	0	0	0	0	3	3	0	0	0	0	1	3	3	3	2	2	3	4	2	1	4	3	3	2	4	1	1	1	2	4	4	2	3	0	0	0
CKSH46	2	0	0	0	2	3	1	4	0	0	0	2	3	2	1	0	0	3	3	0	0	0	0	1	3	3	0	0	2	3	0	0	0	0	0	3	2	4	1	1	1	2	0	0	0	0	2	3	3
CKSH46	2	0	0	0	2	3	1	4	0	0	0	2	3	2	1	0	0	3	3	0	0	0	0	1	3	3	0	0	2	3	0	0	0	0	0	3	2	4	1	1	1	2	0	0	0	0	2	3	3
CKYN01	2	0	0	0	2	3	1	4	0	0	0	2	3	2	1	1	4	3	3	3	4	2	2	1	3	3	0	0	2	3	0	0	0	0	0	3	2	4	1	1	1	2	4	4	2	3	0	0	0
CKYN01	2	0	0	0	2	3	1	4	0	0	0	2	3	2	1	3	4	3	3	3	4	2	4	1	3	3	0	0	2	3	0	0	0	0	0	3	2	4	1	1	1	2	4	4	2	3	0	0	0
CKYN02	2	0	1	1	2	3	1	4	0	0	0	0	0	0	0	3	4	3	1	0	0	0	0	0	0	0	3	2	2	3	4	2	1	4	3	3	2	4	1	1	1	2	4	4	2	3	0	0	0
CKYN02	2	0	1	1	2	3	1	4	0	0	0	0	0	0	0	3	4	3	3	0	0	0	0	0	0	0	3	2	2	3	4	2	1	4	3	3	2	4	1	1	1	2	4	4	2	3	0	0	0
G1351	2	0	1	1	0	0	0	0	0	0	0	2	3	2	1	1	4	3	3	3	4	2	2	1	3	3	3	2	0	0	4	2	1	4	3	0	0	4	1	1	1	2	4	4	2	3	2	3	3
G1351	2	0	1	1	0	0	0	0	0	0	0	2	3	2	1	1	4	3	3	3	4	2	2	1	3	3	3	2	0	0	4	2	1	4	3	0	0	4	1	1	1	2	4	4	2	3	2	3	3
G1369	2	0	0	0	2	3	1	4	0	0	0	0	0	0	0	3	4	0	0	3	4	2	2	1	3	3	3	2	2	3	0	0	0	0	0	3	2	4	1	1	1	0	4	4	2	3	2	3	3
G1369	2	0	0	0	2	3	4	4	0	0	0	0	0	0	0	3	4	0	0	3	4	2	2	1	3	3	3	2	2	3	0	0	0	0	0	3	2	4	1	1	1	0	4	4	2	3	2	3	3
G1416	2	0	1	1	2	3	1	4	0	0	0	2	3	2	1	1	4	1	1	0	0	0	0	1	3	3	3	2	0	0	0	0	0	0	0	0	2	4	1	1	1	4	4	4	2	3	0	0	0
G1416	2	0	3	1	2	3	4	4	0	0	0	2	3	2	1	3	4	1	1	0	0	0	0	1	3	3	3	2	0	0	0	0	0	0	0	0	2	4	1	1	1	4	4	4	2	3	0	0	0
G1417	2	2	1	1	2	3	1	4	4	2	4	0	0	0	0	0	0	3	3	0	0	0	0	0	0	0	0	0	2	3	4	2	1	4	3	3	2	0	0	0	0	0	4	4	2	3	2	3	1
G1417	2	3	1	1	2	3	1	4	4	2	4	0	0	0	0	0	0	3	3	0	0	0	0	0	0	0	0	0	2	3	4	2	1	4	3	3	2	0	0	0	0	0	4	4	2	3	2	3	1
G1419	2	0	1	1	2	3	1	4	4	2	4	2	3	2	1	1	4	3	3	3	4	2	2	0	0	0	3	2	0	0	4	2	1	4	3	1	2	4	1	1	1	0	4	4	2	3	0	0	0
G1419	2	0	1	1	2	3	1	4	4	2	4	2	3	2	1	3	4	3	3	3	4	2	4	0	0	0	3	2	0	0	4	2	1	4	3	3	2	4	1	1	1	0	4	4	2	3	0	0	0
G1420	2	2	0	0	2	3	1	4	0	0	0	2	3	2	1	3	4	3	3	3	4	2	2	1	3	3	3	2	0	0	0	0	0	0	0	0	2	0	0	0	0	0	4	4	2	3	2	3	1
G1420	2	3	0	0	2	3	4	4	0	0	0	2	3	2	1	3	4	3	3	3	4	2	2	1	3	3	3	2	0	0	0	0	0	0	0	0	2	0	0	0	0	0	4	4	2	3	2	3	3
G1426	2	3	0	0	2	3	1	4	4	2	4	0	0	0	0	1	4	3	3	0	0	0	0	0	0	0	3	2	2	3	0	0	0	0	0	3	2	4	1	1	1	0	4	4	2	3	2	3	3
G1426	2	3	0	0	2	3	1	4	4	2	4	0	0	0	0	1	4	3	3	0	0	0	0	0	0	0	3	2	2	3	0	0	0	0	0	3	2	4	1	1	1	0	4	4	2	3	2	3	3
G1429	2	3	3	1	2	3	1	4	4	2	4	0	0	0	0	3	4	3	3	3	4	2	2	0	0	0	3	2	0	0	4	2	1	4	3	3	2	0	0	0	0	2	4	4	2	0	2	3	3
G1429	2	3	3	1	2	3	1	4	4	2	4	0	0	0	0	3	4	3	3	3	4	2	4	0	0	0	3	2	0	0	4	2	1	4	3	3	2	0	0	0	0	2	4	4	2	0	2	3	3
OTSH03	2	3	1	1	2	3	1	4	4	2	4	0	0	0	0	0	0	1	1	0	0	0	0	1	1	3	0	0	2	3	0	0	0	0	0	3	2	4	1	1	1	2	0	0	0	0	0	0	0
OTSH03	2	3	3	1	2	3	1	4	4	2	4	0	0	0	0	0	0	1	1	0	0	0	0	1	1	3	0	0	2	3	0	0	0	0	0	3	2	4	1	1	1	2	0	0	0	0	0	0	0
OTSH04	2	3	1	1	2	3	1	4	0	0	0	0	0	0	0	1	4	1	1	0	0	0	0	1	3	3	1	4	2	3	2	4	1	4	3	0	0	4	1	1	1	0	0	0	0	0	2	3	3
OTSH04	2	3	1	1	2	3	1	4	0	0	0	0	0	0	0	1	4	1	1	0	0	0	0	1	3	3	1	4	2	3	2	4	1	4	3	0	0	4	1	1	1	0	0	0	0	0	2	3	3
[truncated: 2,203 more columns]
