# Supplementary material for: Multiplexed ISSR genotyping by sequencing distinguishes two precious coral species (Anthozoa: Octocorallia: Coralliidae) that share a mitochondrial haplotype
Source: PeerJ. 2019 Oct 4;7:e7769. doi: 10.7717/peerj.7769 (PMC6779117; doi:10.7717/peerj.7769)
Supplement: Supplemental Information 2 [file peerj-07-7769-s002.xlsx]

## Sheet: batch_1.structure
		13_9	28_26	44_3	52_2	65_27	103_26	123_37	145_27	146_52	198_15	223_45	232_4	244_51	271_77	288_9	335_49	365_0	374_1	377_40	383_39	384_25	388_14	394_55	402_8	403_3	408_49	418_4	424_45	425_0	427_24	428_21	430_6	452_25	458_78	460_73	465_6	474_61	478_45	482_16	493_9	494_48	520_77	543_1	548_59	554_24	561_15	563_21	567_17
OTSH02	1	0	3	0	0	2	3	0	1	1	3	3	0	0	0	0	0	1	2	2	0	0	2	2	3	2	3	0	4	0	4	3	2	4	0	0	0	3	1	3	2	1	2	3	3	1	4	4	2
OTSH02	1	0	3	0	0	2	3	0	1	1	3	3	0	0	0	0	0	1	2	4	0	0	2	2	3	3	3	0	4	0	4	3	2	4	0	0	0	3	1	3	2	1	2	3	3	1	4	4	2
CE-AMM001	1	3	3	4	2	2	3	1	1	1	3	3	2	3	2	4	2	1	2	2	3	4	2	2	3	2	3	3	4	3	4	3	2	2	1	1	1	3	1	3	2	1	2	3	3	1	4	4	2
CE-AMM001	1	3	3	4	2	2	3	1	1	1	3	3	2	3	2	4	2	1	2	4	3	4	2	2	3	3	3	3	4	3	4	3	2	4	1	1	4	3	1	3	2	1	2	3	3	1	4	4	2
CE-HTR001	1	3	0	2	2	2	0	0	1	0	0	3	4	3	0	4	2	0	2	2	0	0	2	2	3	3	3	3	4	3	4	0	0	4	0	1	0	3	1	3	2	1	0	3	0	0	0	0	2
CE-HTR001	1	3	0	4	2	4	0	0	1	0	0	3	4	3	0	4	2	0	2	4	0	0	2	2	3	3	3	3	4	3	4	0	0	4	0	1	0	3	1	3	2	1	0	3	0	0	0	0	2
CE-HTR002	1	3	3	0	2	0	0	1	1	0	0	0	2	0	0	0	0	0	2	2	4	4	2	2	3	3	3	3	4	3	4	0	2	4	0	1	4	3	1	3	2	1	0	3	0	0	4	0	0
CE-HTR002	1	3	3	0	2	0	0	1	1	0	0	0	2	0	0	0	0	0	2	4	4	4	2	2	3	3	3	3	4	3	4	0	2	4	0	1	4	3	1	3	2	1	0	3	0	0	4	0	0
CE-HTR003	1	3	3	0	0	2	0	0	1	1	3	0	4	0	2	4	2	1	2	2	4	0	2	2	0	2	3	3	0	0	4	3	0	4	0	1	0	3	0	3	2	1	2	0	3	1	4	4	2
CE-HTR003	1	3	3	0	0	2	0	0	1	1	3	0	4	0	2	4	2	1	2	4	4	0	2	2	0	3	3	3	0	0	4	3	0	4	0	1	0	3	0	3	2	1	2	0	3	1	4	4	2
CE-IGK003	1	0	3	0	2	4	3	0	1	0	0	0	4	0	2	3	2	0	2	2	0	0	2	2	3	2	3	3	4	3	4	0	0	2	0	1	0	3	0	0	2	1	0	3	0	0	4	4	2
CE-IGK003	1	0	3	0	2	4	3	0	1	0	0	0	4	0	2	3	2	0	2	4	0	0	2	2	3	3	3	3	4	3	4	0	0	2	0	3	0	3	0	0	2	1	0	3	0	0	4	4	2
CE-IGK006	1	0	3	0	2	0	0	0	1	0	0	3	2	3	0	0	2	0	0	2	0	0	2	2	3	0	3	3	4	0	4	3	2	2	0	1	1	3	1	3	2	1	0	3	0	0	4	4	2
CE-IGK006	1	0	3	0	2	0	0	0	1	0	0	3	2	3	0	0	2	0	0	4	0	0	2	2	3	0	3	3	4	0	4	3	2	2	0	1	1	3	1	3	2	1	0	3	0	0	4	4	2
CE-IGK007	1	3	0	2	2	2	3	0	1	1	0	3	0	3	2	0	0	0	2	2	4	0	2	2	3	3	3	3	4	0	0	0	2	2	0	1	0	3	1	3	2	1	0	0	0	0	4	0	2
CE-IGK007	1	3	0	4	2	2	3	0	1	1	0	3	0	3	2	0	0	0	2	4	4	0	2	2	3	3	3	3	4	0	0	0	2	4	0	1	0	3	1	3	2	1	0	0	0	0	4	0	2
CE-IGK008	1	0	3	4	0	0	0	0	1	1	0	3	2	3	0	4	0	1	0	2	0	0	2	2	3	2	3	3	0	3	2	0	2	4	0	1	0	3	0	3	2	1	0	3	0	1	0	0	2
CE-IGK008	1	0	3	4	0	0	0	0	1	1	0	3	2	3	0	4	0	1	0	4	0	0	2	2	3	3	3	3	0	3	2	0	2	4	0	1	0	3	0	3	2	1	0	3	0	1	0	0	2
CE-IGK010	1	3	0	2	0	2	0	1	1	0	0	3	0	0	0	0	0	1	2	0	4	0	2	2	3	2	3	3	4	3	4	3	2	4	0	1	0	3	1	3	2	2	2	3	3	0	4	0	2
CE-IGK010	1	3	0	2	0	2	0	1	1	0	0	3	0	0	0	0	0	1	2	0	4	0	2	2	3	2	3	3	4	3	4	3	2	4	0	1	0	3	1	3	2	2	2	3	3	0	4	0	2
CE-IKM001	1	0	3	0	0	0	3	0	0	0	0	0	4	3	2	4	2	1	2	2	0	0	2	2	0	0	3	3	0	3	4	3	2	2	0	1	1	3	0	3	2	1	0	3	3	0	4	4	2
CE-IKM001	1	0	3	0	0	0	3	0	0	0	0	0	4	3	2	4	2	1	2	4	0	0	2	2	0	0	3	3	0	3	4	3	2	2	0	1	4	3	0	3	2	1	0	4	3	0	4	4	2
CE-IOU005	1	3	0	0	4	2	0	1	1	1	0	3	2	3	0	0	0	0	0	2	0	0	2	0	1	2	3	3	0	3	4	0	2	4	0	1	0	3	1	3	0	1	0	3	3	0	4	4	2
CE-IOU005	1	3	0	0	4	2	0	1	1	1	0	3	2	3	0	0	0	0	0	4	0	0	2	0	3	3	3	3	0	3	4	0	2	4	0	1	0	3	1	3	0	1	0	3	3	0	4	4	2
CE-IOU010	1	0	0	2	2	4	0	0	1	1	0	3	0	3	0	0	0	1	2	0	0	4	2	2	1	3	1	3	0	0	4	3	0	4	1	1	0	3	0	3	2	1	0	3	3	1	4	4	2
CE-IOU010	1	0	0	4	2	4	0	0	1	1	0	3	0	3	0	0	0	1	2	0	0	4	2	2	3	3	1	3	0	0	4	3	0	4	1	1	0	3	0	3	2	1	0	3	3	1	4	4	2
CE-IZN001	1	0	3	0	2	2	3	0	0	1	0	0	2	3	2	4	0	1	2	2	0	0	2	2	3	3	3	3	4	3	4	0	0	4	0	1	0	3	1	3	2	1	0	3	0	0	4	4	2
CE-IZN001	1	0	3	0	2	2	3	0	0	1	0	0	2	3	2	4	0	1	2	4	0	0	2	2	3	3	3	3	4	3	4	0	0	4	0	1	0	3	1	3	2	1	0	3	0	0	4	4	2
CE-NKN001	1	0	0	2	0	2	3	3	1	0	0	3	0	3	2	4	0	0	2	0	4	0	2	2	3	2	3	3	0	3	4	3	0	4	0	1	0	3	1	3	0	1	0	0	3	1	4	4	0
CE-NKN001	1	0	0	4	0	2	3	3	1	0	0	3	0	3	2	4	0	0	2	0	4	0	2	2	3	3	3	3	0	3	4	3	0	4	0	1	0	3	1	3	0	1	0	0	3	1	4	4	0
CE-TAK001	1	0	0	0	2	0	0	1	1	0	0	3	0	3	0	4	0	1	0	2	0	0	2	2	3	3	3	3	4	3	0	0	2	2	0	1	1	0	1	3	2	2	0	0	3	0	4	0	2
CE-TAK001	1	0	0	0	2	0	0	1	1	0	0	3	0	3	0	4	0	1	0	4	0	0	2	2	3	3	3	3	4	3	0	0	2	4	0	1	4	0	1	3	2	2	0	0	3	0	4	0	2
CE-TAK003	1	0	3	0	0	0	0	1	1	1	0	3	0	3	0	0	0	0	2	2	0	0	2	2	3	2	3	3	4	3	0	0	2	0	0	0	1	3	1	3	2	0	0	0	0	0	4	0	0
CE-TAK003	1	0	3	0	0	0	0	1	1	1	0	3	0	3	0	0	0	0	2	4	0	0	2	2	3	3	3	3	4	3	0	0	2	0	0	0	4	3	1	3	2	0	0	0	0	0	4	0	0
CE-TKN002	1	0	3	4	2	0	0	1	1	0	0	3	0	0	0	0	0	1	0	0	0	0	2	2	1	2	3	0	0	3	4	3	2	4	0	1	1	3	1	3	2	1	2	3	0	0	4	4	2
CE-TKN002	1	0	3	4	2	0	0	1	1	0	0	3	0	0	0	0	0	1	0	0	0	0	2	2	3	2	3	0	0	3	4	3	2	4	0	1	4	3	1	3	2	1	2	3	0	0	4	4	2
CE-TKN003	1	0	0	4	0	0	3	1	1	1	0	3	0	3	4	4	0	1	0	2	0	0	2	2	3	2	1	3	0	0	4	0	2	2	0	1	1	3	1	3	2	1	2	3	0	0	4	4	2
CE-TKN003	1	0	0	4	0	0	3	1	1	1	0	3	0	3	4	4	0	1	0	4	0	0	2	2	3	3	1	3	0	0	4	0	2	2	0	1	4	3	1	3	2	1	2	3	0	0	4	4	2
CE-TNG002	1	3	3	0	2	2	0	1	0	1	0	3	0	0	2	4	0	1	2	2	4	0	2	2	1	0	0	0	4	3	4	3	0	2	0	1	4	3	1	3	2	1	2	3	3	1	4	4	2
CE-TNG002	1	3	3	0	2	2	0	1	0	1	0	3	0	0	4	4	0	1	2	4	4	0	2	2	3	0	0	0	4	3	4	3	0	4	0	1	4	3	1	3	2	2	2	3	3	1	4	4	2
CE-TNG005	1	0	0	2	4	0	3	1	1	1	0	3	2	3	0	4	0	0	2	0	4	0	2	2	3	3	0	0	4	0	4	3	0	2	0	1	0	3	1	3	2	1	2	3	3	0	4	0	2
CE-TNG005	1	0	0	4	4	0	3	1	1	1	0	3	2	3	0	4	0	0	2	0	4	0	2	2	3	3	0	0	4	0	4	3	0	2	0	1	0	3	1	3	2	1	2	3	3	0	4	0	2
CE-TNG006	1	3	0	0	4	2	3	1	0	1	0	3	0	3	2	0	0	1	2	2	4	4	2	2	3	3	0	3	4	3	4	0	0	2	0	1	0	3	1	1	2	0	0	3	0	1	4	4	2
CE-TNG006	1	3	0	0	4	2	3	1	0	1	0	3	0	3	2	0	0	1	2	4	4	4	2	2	3	3	0	3	4	3	4	0	0	2	0	1	0	3	1	1	2	0	0	3	0	1	4	4	2
CE-TRM004	1	0	0	2	2	0	3	1	1	1	0	3	0	0	0	0	0	1	2	0	0	0	2	2	3	3	3	3	0	3	4	0	2	4	0	1	0	3	1	3	0	1	0	3	0	0	4	0	2
CE-TRM004	1	0	0	4	2	0	3	1	1	1	0	3	0	0	0	0	0	1	2	0	0	0	2	2	3	3	3	3	0	3	4	0	2	4	0	1	0	3	1	3	0	1	0	3	0	0	4	0	2
CE-YAK002	1	0	1	0	0	0	3	1	1	1	0	0	2	0	0	4	0	1	2	2	0	4	2	2	3	3	3	3	3	3	4	0	0	4	1	1	0	3	0	3	2	1	0	3	3	0	4	0	2
CE-YAK002	1	0	3	0	0	0	3	1	1	1	0	0	2	0	0	4	0	1	2	4	0	4	2	2	3	3	3	3	3	3	4	0	0	4	1	1	0	3	0	3	2	2	0	3	3	0	4	0	2
CE-YAK003	1	0	3	0	0	2	3	0	1	1	0	3	4	3	2	0	0	1	2	2	4	0	2	2	3	2	3	3	3	0	4	3	2	2	0	1	0	0	0	3	2	1	2	0	3	0	4	4	2
CE-YAK003	1	0	3	0	0	2	3	0	1	1	0	3	4	3	4	0	0	1	2	4	4	0	2	2	3	2	3	3	3	0	4	3	2	2	0	1	0	0	0	3	2	1	2	0	3	0	4	4	2
CE-YAK004	1	0	3	4	0	2	3	1	1	0	3	3	0	3	0	0	0	0	2	0	0	0	2	2	3	2	3	3	0	3	4	0	2	2	0	1	0	3	1	3	2	1	0	3	0	0	4	0	2
CE-YAK004	1	0	3	4	0	2	3	1	1	0	3	3	0	3	0	0	0	0	2	0	0	0	2	2	3	3	3	3	0	3	4	0	2	4	0	1	0	3	1	3	2	2	0	3	0	0	4	0	2
CE-YAK006	1	3	3	2	0	2	0	0	0	1	0	3	4	0	2	0	2	1	2	2	3	0	2	2	3	0	3	3	4	0	4	3	0	2	1	1	1	3	1	3	2	1	0	0	3	1	4	4	2
CE-YAK006	1	3	3	2	0	2	0	0	0	1	0	3	4	0	2	0	2	1	2	4	3	0	2	2	3	0	3	3	4	0	4	3	0	2	1	1	1	3	1	3	2	1	0	0	3	1	4	4	2
CK-IOU002	2	3	0	0	4	2	1	0	3	1	3	0	0	0	0	4	0	4	2	0	4	4	0	2	3	3	0	0	4	0	4	0	2	0	2	0	0	3	0	0	4	2	2	3	3	0	0	4	2
CK-IOU002	2	3	0	0	4	2	1	0	3	3	3	0	0	0	0	4	0	4	2	0	4	4	0	2	3	3	0	0	4	0	4	0	2	0	2	0	0	3	0	0	4	2	2	3	3	0	0	4	2
CK-IOU003	2	0	0	0	4	0	0	0	3	0	0	2	0	3	0	0	2	0	0	4	4	4	2	0	3	0	1	3	4	0	4	1	2	2	0	1	1	3	0	1	0	2	2	3	0	0	0	4	2
CK-IOU003	2	0	0	0	4	0	0	0	3	0	0	2	0	3	0	0	2	0	0	4	4	4	2	0	3	0	1	3	4	0	4	1	2	2	0	3	4	3	0	1	0	2	2	3	0	0	0	4	2
CK-IOU004	2	3	0	0	4	2	1	3	3	1	3	2	0	3	0	4	2	0	2	4	4	4	0	2	3	3	0	3	3	3	0	3	2	2	2	1	1	3	0	0	0	2	0	0	4	0	4	4	0
CK-IOU004	2	3	0	0	4	2	3	3	3	1	3	2	0	3	0	4	2	0	4	4	4	4	0	2	3	3	0	3	3	3	0	3	2	2	2	3	1	3	0	0	0	2	0	0	4	0	4	4	0
CK-IOU006	2	0	1	0	4	2	1	3	0	0	3	0	0	3	0	4	0	0	0	0	0	0	2	2	3	0	0	3	4	0	0	0	0	0	0	0	0	3	1	1	4	2	0	3	3	1	0	0	2
CK-IOU006	2	0	3	0	4	2	1	3	0	0	3	0	0	3	0	4	0	0	0	0	0	0	2	2	3	0	0	3	4	0	0	0	0	0	0	0	0	3	1	1	4	2	0	3	4	1	0	0	2
CK-IOU007	2	0	0	2	0	0	3	0	3	3	3	0	0	3	2	4	4	0	2	4	0	4	0	2	3	0	0	3	4	0	0	3	2	2	0	3	0	3	1	1	4	2	2	3	3	0	4	4	2
CK-IOU007	2	0	0	2	0	0	3	0	3	3	3	0	0	3	2	4	4	0	2	4	0	4	0	2	3	0	0	3	4	0	0	3	2	2	0	3	0	3	1	1	4	2	2	3	3	0	4	4	2
CK-TAK001	2	2	0	2	4	2	0	0	3	0	0	0	0	3	0	0	2	0	2	4	0	4	0	2	3	0	1	0	4	3	4	1	2	0	0	1	4	1	1	1	4	2	2	3	4	1	0	4	4
CK-TAK001	2	3	0	2	4	2	0	0	3	0	0	0	0	3	0	0	2	0	2	4	0	4	0	2	3	0	1	0	4	3	4	1	2	0	0	3	4	3	1	1	4	2	2	3	4	1	0	4	4
CK-TAK002	2	3	0	2	4	2	0	3	0	0	0	0	0	3	2	0	2	0	0	4	0	0	2	2	0	3	3	3	4	3	0	3	2	0	0	0	1	3	1	1	0	2	2	3	0	0	0	4	0
CK-TAK002	2	3	0	2	4	2	0	3	0	0	0	0	0	3	2	0	2	0	0	4	0	0	4	2	0	3	3	3	4	3	0	3	2	0	0	0	1	3	1	1	0	2	2	3	0	0	0	4	0
CK-TAK003	2	3	1	2	4	2	0	0	3	0	0	2	4	3	0	0	0	0	2	4	4	4	0	2	3	3	3	3	3	3	0	0	0	0	0	1	1	3	0	1	4	2	2	3	4	0	1	0	2
CK-TAK003	2	3	1	2	4	2	0	0	3	0	0	2	4	3	0	0	0	0	2	4	4	4	0	2	3	3	3	3	3	3	0	0	0	0	0	1	1	3	0	1	4	2	2	3	4	0	1	0	2
CK-TAK004	2	0	0	2	4	0	1	0	3	0	3	2	0	1	0	4	0	0	2	4	0	4	0	2	3	0	1	3	0	0	0	1	2	0	0	3	1	3	0	0	0	2	2	3	3	0	0	4	2
CK-TAK004	2	0	0	2	4	0	1	0	3	0	3	2	0	3	0	4	0	0	2	4	0	4	0	2	3	0	1	3	0	0	0	1	2	0	0	3	4	3	0	0	0	2	2	3	3	0	0	4	2
CK-TAK005	2	3	1	2	0	2	0	0	3	1	3	2	4	3	2	4	0	4	2	4	4	4	0	2	3	3	1	3	0	0	0	1	0	0	2	1	1	3	1	1	4	2	2	3	3	1	0	4	0
CK-TAK005	2	3	1	2	0	2	0	0	3	1	3	2	4	3	2	4	0	4	2	4	4	4	0	2	3	3	1	3	0	0	0	1	0	0	2	3	1	3	1	1	4	2	2	3	4	1	0	4	0
CK-TAK006	2	3	0	2	4	2	0	0	3	1	3	0	0	0	0	4	2	0	2	4	4	0	2	2	3	3	0	3	3	3	0	3	2	2	0	1	1	3	1	1	0	2	2	0	0	0	0	4	2
CK-TAK006	2	3	0	2	4	2	0	0	3	1	3	0	0	0	0	4	2	0	2	4	4	0	2	2	3	3	0	3	3	3	0	3	2	2	0	3	1	3	1	1	0	2	2	0	0	0	0	4	2
CK-TAK008	2	0	3	2	4	0	1	3	0	1	0	2	2	0	0	0	2	0	0	4	0	4	2	2	3	0	0	3	3	3	4	0	2	2	0	1	1	3	0	1	0	2	0	0	3	0	0	4	0
CK-TAK008	2	0	3	2	4	0	3	3	0	3	0	2	2	0	0	0	2	0	0	4	0	4	2	2	3	0	0	3	3	3	4	0	2	2	0	1	1	3	0	1	0	2	0	0	3	0	0	4	0
CK-TNG002	2	0	1	2	4	2	1	3	0	3	0	2	0	3	2	4	0	0	2	4	0	4	2	0	3	3	1	3	0	3	0	0	0	0	0	0	1	3	0	1	0	2	2	3	0	0	4	0	2
CK-TNG002	2	0	1	2	4	2	3	3	0	3	0	2	0	3	2	4	0	0	2	4	0	4	2	0	3	3	1	3	0	3	0	0	0	0	0	0	4	3	0	1	0	2	2	3	0	0	4	0	2
CKA01	2	3	1	2	0	2	0	3	3	1	0	2	4	0	2	4	0	4	2	4	4	4	0	2	3	3	1	3	0	0	4	1	2	0	2	1	1	3	1	1	0	2	2	3	3	1	0	4	2
CKA01	2	3	3	2	0	2	0	3	3	3	0	2	4	0	2	4	0	4	2	4	4	4	0	2	3	3	1	3	0	0	4	1	2	0	2	3	1	3	1	1	0	2	2	3	4	1	0	4	2
CKF-Q-O	2	0	0	2	0	2	1	3	3	0	0	0	4	3	2	4	2	4	2	4	4	4	2	0	3	0	1	3	4	3	4	1	2	2	2	1	0	3	1	1	4	0	2	0	3	0	4	4	2
CKF-Q-O	2	0	0	2	0	2	3	3	3	0	0	0	4	3	2	4	2	4	2	4	4	4	2	0	3	0	1	3	4	3	4	1	2	2	2	3	0	3	1	1	4	0	2	0	4	0	4	4	2
CKF02	2	3	1	2	4	2	0	0	0	1	3	2	0	0	2	0	0	4	0	4	0	4	2	0	3	3	0	3	0	3	0	1	2	2	2	1	1	0	1	1	4	2	2	3	3	1	4	4	0
CKF02	2	3	1	2	4	2	0	0	0	1	3	2	0	0	2	0	0	4	0	4	0	4	2	0	3	3	0	3	0	3	0	1	2	2	2	1	1	0	1	1	4	2	2	3	4	1	4	4	0
CKF05	2	3	1	2	0	0	0	0	3	1	0	0	4	0	2	4	2	4	0	4	4	4	0	2	3	3	0	3	0	0	0	3	0	0	2	3	0	1	1	1	0	0	2	0	4	1	4	4	2
CKF05	2	3	3	2	0	0	0	0	3	1	0	0	4	0	2	4	2	4	0	4	4	4	0	2	3	3	0	3	0	0	0	3	0	0	2	3	0	1	1	1	0	0	4	0	4	1	4	4	2
CKF06	2	0	1	0	4	2	1	1	0	1	0	0	4	3	2	4	0	4	2	4	0	4	0	2	3	3	0	3	4	0	4	0	2	2	2	1	1	0	1	1	0	2	2	3	3	1	4	4	2
CKF06	2	0	1	0	4	2	3	1	0	1	0	0	4	3	2	4	0	4	2	4	0	4	0	4	3	3	0	3	4	0	4	0	4	2	2	3	1	0	1	1	0	2	2	3	3	1	4	4	2
CKF07	2	3	0	2	4	0	1	3	0	1	1	0	2	3	2	4	2	4	2	4	0	1	2	2	3	3	0	3	3	0	0	0	2	0	2	1	1	3	1	1	4	0	0	0	3	1	4	4	2
CKF07	2	3	0	2	4	0	1	3	0	1	1	0	2	3	2	4	2	4	2	4	0	4	2	2	3	3	0	3	3	0	0	0	2	0	2	3	1	3	1	1	4	0	0	0	3	1	4	4	2
CKF09	2	3	1	0	0	2	1	0	3	1	3	0	4	3	2	4	4	4	2	4	4	4	2	2	3	3	0	3	0	3	4	3	2	0	2	1	1	3	1	1	4	0	2	3	3	1	4	4	2
CKF09	2	3	3	0	0	2	1	0	3	1	3	0	4	3	2	4	4	4	2	4	4	4	4	2	3	3	0	3	0	3	4	3	2	0	2	3	1	3	1	1	4	0	4	3	3	1	4	4	2
CKF10	2	3	1	2	4	0	3	0	0	1	3	2	0	0	2	4	2	4	0	2	4	0	0	0	3	3	1	3	0	0	0	3	0	2	2	1	1	0	1	0	0	2	2	3	3	1	0	4	2
CKF10	2	3	3	2	4	0	3	0	0	3	3	2	0	0	2	4	2	4	0	4	4	0	0	0	3	3	1	3	0	0	0	3	0	2	2	3	4	0	1	0	0	2	2	3	3	1	0	4	2
CKF18	2	0	3	0	0	2	0	0	3	0	3	0	4	0	2	4	2	4	2	4	0	4	0	2	3	3	1	3	4	3	4	3	0	0	2	0	1	1	0	1	4	0	2	3	3	0	0	4	2
CKF18	2	0	3	0	0	2	0	0	3	0	3	0	4	0	2	4	2	4	2	4	0	4	0	2	3	3	1	3	4	3	4	3	0	0	2	0	1	3	0	1	4	0	4	3	3	0	0	4	2
CKSH01	2	3	1	2	4	2	0	0	3	1	3	2	0	0	2	4	0	0	2	4	0	4	0	2	3	3	0	3	4	0	0	0	2	0	2	3	1	3	0	1	0	2	0	3	3	1	4	0	0
CKSH01	2	3	3	2	4	2	0	0	3	1	3	2	0	0	2	4	0	0	2	4	0	4	0	2	3	3	0	3	4	0	0	0	2	0	2	3	1	3	0	1	0	2	0	3	3	1	4	0	0
CKSH02	2	0	0	2	4	2	1	3	0	1	0	0	0	3	2	4	2	0	0	4	0	4	0	0	3	3	0	3	4	3	4	3	2	2	0	3	1	0	1	1	0	2	2	0	3	1	4	4	0
CKSH02	2	0	0	2	4	2	3	3	0	1	0	0	0	3	2	4	2	0	0	4	0	4	0	0	3	3	0	3	4	3	4	3	2	2	0	3	1	0	1	1	0	2	2	0	3	1	4	4	0
CKSH03	2	3	0	0	4	2	1	1	0	1	3	2	4	3	0	0	0	0	2	4	4	4	0	0	3	3	0	3	4	0	4	3	2	0	0	0	0	3	0	1	0	2	2	3	4	1	0	4	2
CKSH03	2	3	0	0	4	2	1	1	0	3	3	2	4	3	0	0	0	0	2	4	4	4	0	0	3	3	0	3	4	0	4	3	2	0	0	0	0	3	0	1	0	2	2	3	4	1	0	4	2
CKSH05	2	3	3	0	4	0	1	0	3	1	0	2	0	3	2	4	4	4	2	4	4	4	0	2	3	3	3	3	4	3	0	3	2	0	2	0	0	0	0	1	0	0	2	0	3	1	4	4	2
CKSH05	2	3	3	0	4	0	3	0	3	1	0	2	0	3	2	4	4	4	2	4	4	4	0	2	3	3	3	3	4	3	0	3	2	0	2	0	0	0	0	1	0	0	2	0	3	1	4	4	2
CKSH06	2	3	3	0	0	0	1	0	3	1	3	2	2	3	2	4	2	4	0	4	0	4	2	2	3	3	0	3	3	0	4	0	2	2	2	0	1	3	1	1	0	2	2	0	3	0	4	4	2
CKSH06	2	3	3	0	0	0	1	0	3	1	3	2	2	3	2	4	2	4	0	4	0	4	2	2	3	3	0	3	3	0	4	0	2	2	2	0	1	3	1	1	0	2	2	0	3	0	4	4	2
CKSH07	2	3	3	0	4	0	0	3	0	1	3	2	2	3	0	0	2	0	0	4	4	4	0	2	3	3	0	3	3	3	0	0	2	2	2	3	1	0	1	1	0	2	2	0	3	1	0	4	2
CKSH07	2	3	3	0	4	0	0	3	0	1	3	2	2	3	0	0	2	0	0	4	4	4	0	2	3	3	0	3	3	3	0	0	2	2	2	3	1	0	1	1	0	2	2	0	3	3	0	4	2
CKSH08	2	3	0	0	0	0	1	0	3	1	3	2	2	3	0	4	2	4	0	4	4	4	2	2	3	3	0	3	3	0	0	0	2	2	2	3	1	3	1	1	0	2	2	3	3	1	0	4	2
CKSH08	2	3	0	0	0	0	1	0	3	1	3	2	2	3	0	4	2	4	0	4	4	4	2	2	3	3	0	3	3	0	0	0	2	2	2	3	1	3	1	1	0	2	2	3	3	3	0	4	2
CKSH09	2	0	1	2	4	0	1	0	3	0	3	2	4	3	2	0	2	4	2	4	4	4	2	0	3	3	0	3	3	0	0	0	2	0	2	1	1	0	3	0	0	0	2	3	3	1	4	4	4
CKSH09	2	0	3	2	4	0	3	0	3	0	3	2	4	3	2	0	2	4	2	4	4	4	2	0	3	3	0	3	4	0	0	0	2	0	2	3	1	0	3	0	0	0	2	3	3	1	4	4	4
CKSH10	2	2	0	2	4	2	0	3	0	0	3	2	0	3	2	0	2	4	2	4	0	4	2	2	3	3	0	3	0	3	0	0	0	2	2	3	1	3	1	1	0	2	2	3	3	1	4	4	2
CKSH10	2	3	0	2	4	2	0	3	0	0	3	2	0	3	2	0	2	4	2	4	0	4	2	2	3	3	0	3	0	3	0	0	0	2	2	3	1	3	1	1	0	2	2	3	4	1	4	4	2
CKSH11	2	0	1	2	0	0	1	0	3	1	0	0	0	3	2	4	0	4	2	4	4	4	0	0	3	3	1	3	4	0	4	3	0	2	2	1	1	3	1	0	0	2	0	3	3	0	4	2	2
CKSH11	2	0	3	2	0	0	3	0	3	1	0	0	0	3	2	4	0	4	4	4	4	4	0	0	3	3	1	3	4	0	4	3	0	2	2	3	1	3	1	0	0	2	0	3	3	0	4	4	2
CKSH12	2	0	1	2	0	2	0	3	3	1	0	2	4	3	2	4	0	4	0	4	4	4	2	2	0	3	0	0	0	0	0	3	2	0	2	1	0	0	1	1	0	2	0	3	3	1	4	4	0
CKSH12	2	0	3	2	0	2	0	3	3	1	0	2	4	3	2	4	0	4	0	4	4	4	2	2	0	3	0	0	0	0	0	3	2	0	2	3	0	0	1	1	0	2	0	3	4	1	4	4	0
CKSH15	2	0	1	2	4	0	3	0	3	0	3	0	0	1	2	0	0	4	2	4	4	4	0	2	3	0	0	1	0	3	0	1	2	2	2	3	1	0	1	1	0	2	0	3	4	1	4	4	0
CKSH15	2	0	1	2	4	0	3	0	3	0	3	0	0	3	2	0	0	4	2	4	4	4	0	2	3	0	0	3	0	3	0	1	2	2	2	3	4	0	1	1	0	2	0	3	4	1	4	4	0
CKSH16	2	0	1	2	0	0	1	0	3	0	1	2	4	3	2	4	2	4	0	4	4	0	0	0	3	3	0	0	0	0	4	0	2	0	2	0	0	3	1	1	0	2	2	3	3	0	4	4	0
CKSH16	2	0	1	2	0	0	3	0	3	0	1	2	4	3	2	4	2	4	0	4	4	0	0	0	3	3	0	0	0	0	4	0	2	0	2	0	0	3	1	1	0	2	2	3	4	0	4	4	0
CKSH17	2	3	1	0	4	2	0	3	0	1	3	0	0	3	2	4	2	4	2	4	0	4	0	2	3	3	1	0	4	3	4	1	2	0	2	1	1	3	0	1	4	2	2	3	3	1	4	4	0
CKSH17	2	3	3	0	4	2	0	3	0	3	3	0	0	3	2	4	2	4	2	4	0	4	0	2	3	3	1	0	4	3	4	1	2	0	2	3	1	3	0	1	4	2	2	3	4	1	4	4	0
CKSH18	2	3	3	0	0	2	0	0	0	0	3	0	4	3	2	0	2	4	2	4	4	4	0	2	3	0	1	3	4	3	4	0	2	0	2	0	0	1	0	1	4	0	2	3	3	1	4	4	2
CKSH18	2	3	3	0	0	2	0	0	0	0	3	0	4	3	2	0	2	4	2	4	4	4	0	2	3	0	1	3	4	3	4	0	2	0	2	0	0	3	0	1	4	0	2	3	3	1	4	4	2
CKSH19	2	2	1	2	4	2	1	0	0	1	3	2	4	3	2	4	0	4	0	4	4	0	2	2	3	3	3	3	0	3	4	0	0	2	2	1	0	3	1	1	4	0	2	3	3	0	0	2	0
CKSH19	2	3	1	2	4	2	1	0	0	1	3	2	4	3	2	4	0	4	0	4	4	0	2	2	3	3	3	3	0	3	4	0	0	2	2	3	0	3	1	1	4	0	2	3	4	0	0	4	0
CKSH20	2	0	0	2	4	0	0	3	0	1	3	0	4	3	0	4	2	4	2	4	4	4	2	2	3	3	0	3	4	3	0	3	2	2	2	1	1	3	1	1	0	2	0	0	3	0	0	4	0
CKSH20	2	0	0	2	4	0	0	3	0	1	3	0	4	3	0	4	2	4	2	4	4	4	2	2	3	3	0	3	4	3	0	3	2	2	2	3	1	3	1	1	0	2	0	0	4	0	0	4	0
CKSH21	2	3	1	0	0	0	0	3	0	1	0	0	0	3	2	4	4	4	0	4	4	4	0	2	3	3	1	3	3	3	2	0	2	2	2	0	0	3	1	1	4	2	2	0	3	0	4	4	4
CKSH21	2	3	3	0	0	0	0	3	0	1	0	0	0	3	2	4	4	4	0	4	4	4	0	2	3	3	1	3	3	3	2	0	2	2	2	0	0	3	1	1	4	2	2	0	4	0	4	4	4
CKSH22	2	3	3	2	0	0	1	0	3	3	3	0	4	3	2	4	4	4	2	2	4	4	0	0	3	3	3	3	0	3	0	3	0	0	2	1	1	0	1	0	4	2	2	0	3	1	0	4	2
CKSH22	2	3	3	2	0	0	3	0	3	3	3	0	4	3	2	4	4	4	2	4	4	4	0	0	3	3	3	3	0	3	0	3	0	0	2	3	4	0	1	0	4	2	2	0	3	1	0	4	2
CKSH23	2	2	0	2	0	0	0	3	3	0	1	0	4	3	2	4	2	4	0	4	0	1	0	2	0	3	0	3	0	3	0	0	2	2	2	3	1	3	0	1	0	2	0	3	3	1	0	4	2
CKSH23	2	3	0	2	0	0	0	3	3	0	1	0	4	3	2	4	2	4	0	4	0	4	0	2	0	3	0	3	0	3	0	0	2	2	2	3	4	3	0	1	0	2	0	3	3	1	0	4	2
CKSH24	2	0	1	0	0	2	0	3	3	0	3	2	4	3	0	0	0	4	2	4	0	4	0	2	3	3	0	3	0	0	0	0	0	2	2	1	1	0	1	1	0	2	2	0	3	1	4	4	0
CKSH24	2	0	3	0	0	2	0	3	3	0	3	2	4	3	0	0	0	4	2	4	0	4	0	2	3	3	0	3	0	0	0	0	0	2	2	3	1	0	1	1	0	2	2	0	4	1	4	4	0
CKSH25	2	2	3	2	4	2	1	3	0	0	3	0	4	3	2	0	2	4	0	4	0	4	2	0	3	3	1	3	3	3	0	3	2	2	2	1	1	3	1	1	0	0	0	0	3	0	0	4	0
CKSH25	2	3	3	2	4	2	3	3	0	0	3	0	4	3	2	0	2	4	0	4	0	4	2	0	3	3	1	3	3	3	0	3	2	2	2	3	1	3	1	1	0	0	0	0	4	0	0	4	0
CKSH27	2	3	1	0	0	2	0	0	0	1	3	0	4	3	2	4	0	4	0	4	4	4	0	2	3	3	1	3	4	3	0	1	2	0	2	1	0	3	1	1	0	2	2	3	3	1	0	4	0
CKSH27	2	3	1	0	0	2	0	0	0	1	3	0	4	3	2	4	0	4	0	4	4	4	0	2	3	3	1	3	4	3	0	1	2	0	2	3	0	3	1	1	0	2	2	3	3	1	0	4	0
CKSH28	2	0	1	2	0	0	0	0	0	1	3	0	0	0	2	4	2	4	2	4	0	0	0	0	3	0	0	3	0	3	0	3	2	2	2	3	0	3	1	1	0	0	0	3	3	1	0	4	2
CKSH28	2	0	1	2	0	0	0	0	0	1	3	0	0	0	2	4	2	4	2	4	0	0	0	0	3	0	0	3	0	3	0	3	2	2	2	3	0	3	1	1	0	0	0	3	4	1	0	4	2
CKSH29	2	0	0	0	0	0	0	3	0	1	3	2	4	3	2	4	2	4	0	4	4	4	0	2	3	3	3	3	0	3	0	0	2	0	2	3	1	3	1	1	0	2	2	3	3	0	4	4	0
CKSH29	2	0	0	0	0	0	0	3	0	1	3	2	4	3	2	4	2	4	0	4	4	4	0	2	3	3	3	3	0	3	0	0	2	0	2	3	4	3	1	1	0	2	2	3	3	0	4	4	0
CKSH46	2	0	0	2	0	2	0	3	0	1	0	2	0	3	2	4	2	0	2	4	0	4	0	2	3	3	0	3	4	3	0	3	2	2	2	0	0	3	0	0	4	2	2	3	3	1	4	4	0
CKSH46	2	0	0	2	0	2	0	3	0	1	0	2	0	3	2	4	2	0	2	4	0	4	0	2	3	3	0	3	4	3	0	3	2	2	2	0	0	3	0	0	4	2	2	3	4	1	4	4	0
CKYN01	2	0	0	2	0	2	1	3	3	1	0	2	0	3	2	4	2	4	0	4	4	4	0	0	3	3	0	3	0	3	0	0	2	0	0	3	0	3	1	1	0	2	0	3	3	0	4	4	0
CKYN01	2	0	0	2	0	2	3	3	3	1	0	2	0	3	2	4	2	4	0	4	4	4	0	0	3	3	0	3	0	3	0	0	2	0	0	3	0	3	1	1	0	2	0	3	4	0	4	4	0
CKYN02	2	0	1	2	0	0	3	3	0	0	3	2	4	3	2	4	2	4	0	4	0	4	0	2	3	3	0	3	4	3	0	0	0	2	2	3	1	3	1	1	4	2	2	3	4	1	4	4	2
CKYN02	2	0	1	2	0	0	3	3	0	0	3	2	4	3	2	4	2	4	0	4	0	4	0	4	3	3	0	3	4	3	0	0	0	2	2	3	4	3	1	1	4	2	2	3	4	1	4	4	2
G1351	2	0	1	0	0	2	1	3	3	1	3	0	4	0	0	4	2	4	2	4	4	4	2	2	3	3	1	0	3	0	4	1	0	2	2	1	1	3	0	0	0	2	2	3	0	1	1	4	0
G1351	2	0	1	0	0	2	1	3	3	1	3	0	4	0	0	4	2	4	2	4	4	4	2	2	3	3	1	0	4	0	4	1	0	2	2	3	1	3	0	0	0	2	2	3	0	1	1	4	0
G1369	2	0	0	2	0	0	3	0	3	1	3	2	0	3	2	4	0	4	2	4	4	0	2	2	3	3	0	3	4	3	0	0	0	2	2	3	1	0	1	1	4	0	0	3	3	1	0	4	2
G1369	2	0	0	2	0	0	3	0	3	1	3	2	0	3	2	4	0	4	2	4	4	0	2	2	3	3	0	3	4	3	0	0	0	2	2	3	1	0	1	1	4	0	0	3	4	1	0	4	2
G1416	2	0	1	2	0	2	1	1	0	1	3	0	0	0	2	4	4	4	0	4	0	4	0	2	3	0	1	3	4	3	4	3	0	0	2	1	1	3	1	1	4	0	2	3	4	0	4	4	0
G1416	2	0	3	2	0	2	3	1	0	1	3	0	0	0	2	4	4	4	0	4	0	4	0	2	3	0	1	3	4	3	4	3	0	0	2	1	1	3	1	1	4	0	4	3	4	0	4	4	0
G1417	2	2	1	2	4	0	0	3	0	0	0	2	4	3	2	0	0	4	2	4	0	4	0	2	3	3	1	1	4	3	0	3	2	0	2	1	0	1	0	1	0	2	0	4	3	1	0	4	2
G1417	2	3	1	2	4	0	0	3	0	0	0	2	4	3	2	0	0	4	2	4	0	4	0	2	3	3	1	3	4	3	0	3	2	0	2	3	0	3	0	1	0	2	0	4	4	1	0	4	2
G1419	2	0	1	2	4	2	1	3	3	0	3	0	4	1	2	4	0	4	0	4	4	4	0	2	3	3	0	3	3	3	4	1	2	2	2	1	1	3	0	1	4	2	2	0	3	1	0	4	2
G1419	2	0	1	2	4	2	3	3	3	0	3	0	4	3	2	4	0	4	0	4	4	4	0	2	3	3	0	3	3	3	4	1	2	2	2	3	1	3	0	1	4	2	2	0	4	1	0	4	2
G1420	2	2	0	2	0	2	3	3	3	1	3	0	0	0	2	0	0	4	2	4	0	4	2	0	3	0	1	3	3	1	4	3	2	0	2	0	0	3	0	1	0	0	2	0	3	1	4	4	0
G1420	2	3	0	2	0	2	3	3	3	1	3	0	0	0	2	0	0	4	2	4	0	4	2	0	3	0	1	3	3	1	4	3	2	0	2	0	0	3	0	1	0	0	2	0	4	1	4	4	0
G1426	2	3	0	2	4	0	1	3	0	0	3	2	0	3	2	4	0	4	2	4	4	4	2	2	3	3	1	3	3	3	4	3	2	0	2	0	0	3	0	1	0	2	2	3	3	1	0	4	0
G1426	2	3	0	2	4	0	1	3	0	0	3	2	0	3	2	4	0	4	2	4	4	4	2	2	3	3	1	3	3	3	4	3	4	0	2	0	0	3	0	1	0	2	4	3	4	1	0	4	0
G1429	2	3	3	2	4	0	3	3	3	0	3	0	4	3	2	0	2	4	2	2	4	0	2	2	3	3	0	3	3	0	4	3	2	0	2	1	1	3	1	0	4	2	0	3	4	1	4	4	0
G1429	2	3	3	2	4	0	3	3	3	0	3	0	4	3	2	0	2	4	2	4	4	0	2	2	3	3	0	3	3	0	4	3	2	0	2	1	1	3	1	0	4	2	0	3	4	1	4	4	0
OTSH03	2	3	1	2	4	0	0	1	0	1	0	2	0	3	2	4	2	0	0	2	0	4	0	0	3	0	0	3	3	3	0	3	2	0	2	3	1	3	1	1	0	2	2	0	4	1	0	4	2
OTSH03	2	3	3	2	4	0	0	1	0	1	0	2	0	3	2	4	2	0	0	4	0	4	0	0	3	0	0	3	3	3	0	3	2	0	2	3	4	3	1	1	0	2	2	0	4	1	0	4	2
OTSH04	2	3	1	2	0	0	1	1	0	1	1	2	2	0	0	4	0	0	2	4	0	0	0	2	3	3	1	3	0	0	0	0	2	2	0	3	0	3	1	0	0	2	0	0	4	0	0	4	0
OTSH04	2	3	1	2	0	0	1	1	0	1	1	2	2	0	0	4	0	0	2	4	0	0	0	2	3	3	1	3	0	0	0	0	2	2	0	3	0	3	1	0	0	2	0	0	4	0	0	4	0
[truncated: 714 more columns]
