# Supplementary material for: Multiplexed ISSR genotyping by sequencing distinguishes two precious coral species (Anthozoa: Octocorallia: Coralliidae) that share a mitochondrial haplotype
Source: PeerJ. 2019 Oct 4;7:e7769. doi: 10.7717/peerj.7769 (PMC6779117; doi:10.7717/peerj.7769)
Supplement: Supplemental Information 6 [file peerj-07-7769-s006.xlsx]

## Sheet: Sheet1
Suppl. 2 Detailed information of the raw data used in "Multiplexed ISSR genotyping by sequencing distinguishes two precious coral species (Anthozoa: Octocorallia: Coralliidae) that share a mitochondrial haplotype"
DRA Accession	BioProject ID	BioSample ID	Experiment	Run	Sample name	Specimen
DRA008354	PRJDB8153	SAMD00166505	DRX168318	DRR177792	CE-AMM001	University of Miyazaki/Okinawa Churashima Foundation Reseach Center
		SAMD00166506	DRX168319	DRR177793	CE-HTR001	University of Miyazaki/Okinawa Churashima Foundation Reseach Center
		SAMD00166507	DRX168320	DRR177794	CE-HTR002	University of Miyazaki/Okinawa Churashima Foundation Reseach Center
		SAMD00166508	DRX168321	DRR177795	CE-HTR003	University of Miyazaki/Okinawa Churashima Foundation Reseach Center
		SAMD00166509	DRX168322	DRR177796	CE-IGK003	University of Miyazaki/Okinawa Churashima Foundation Reseach Center
		SAMD00166510	DRX168323	DRR177797	CE-IGK006	University of Miyazaki/Okinawa Churashima Foundation Reseach Center
		SAMD00166511	DRX168324	DRR177798	CE-IGK007	University of Miyazaki/Okinawa Churashima Foundation Reseach Center
		SAMD00166512	DRX168325	DRR177799	CE-IGK008	University of Miyazaki/Okinawa Churashima Foundation Reseach Center
		SAMD00166513	DRX168326	DRR177800	CE-IGK010	University of Miyazaki/Okinawa Churashima Foundation Reseach Center
		SAMD00166514	DRX168327	DRR177801	CE-IKM001	University of Miyazaki/Okinawa Churashima Foundation Reseach Center
		SAMD00166515	DRX168328	DRR177802	CE-IOU005	University of Miyazaki/Okinawa Churashima Foundation Reseach Center
		SAMD00166516	DRX168329	DRR177803	CE-IOU010	University of Miyazaki/Okinawa Churashima Foundation Reseach Center
		SAMD00166517	DRX168330	DRR177804	CE-IZN001	University of Miyazaki/Okinawa Churashima Foundation Reseach Center
		SAMD00166518	DRX168331	DRR177805	CE-NKN001	University of Miyazaki/Okinawa Churashima Foundation Reseach Center
		SAMD00166519	DRX168332	DRR177806	CE-TAK001	University of Miyazaki/Okinawa Churashima Foundation Reseach Center
		SAMD00166520	DRX168333	DRR177807	CE-TAK003	University of Miyazaki/Okinawa Churashima Foundation Reseach Center
		SAMD00166521	DRX168334	DRR177808	CE-TKN002	University of Miyazaki/Okinawa Churashima Foundation Reseach Center
		SAMD00166522	DRX168335	DRR177809	CE-TKN003	University of Miyazaki/Okinawa Churashima Foundation Reseach Center
		SAMD00166523	DRX168336	DRR177810	CE-TNG002	University of Miyazaki/Okinawa Churashima Foundation Reseach Center
		SAMD00166524	DRX168337	DRR177811	CE-TNG005	University of Miyazaki/Okinawa Churashima Foundation Reseach Center
		SAMD00166525	DRX168338	DRR177812	CE-TNG006	University of Miyazaki/Okinawa Churashima Foundation Reseach Center
		SAMD00166526	DRX168339	DRR177813	CE-TRM004	University of Miyazaki/Okinawa Churashima Foundation Reseach Center
		SAMD00166527	DRX168340	DRR177814	CE-YAK002	University of Miyazaki/Okinawa Churashima Foundation Reseach Center
		SAMD00166528	DRX168341	DRR177815	CE-YAK003	University of Miyazaki/Okinawa Churashima Foundation Reseach Center
		SAMD00166529	DRX168342	DRR177816	CE-YAK004	University of Miyazaki/Okinawa Churashima Foundation Reseach Center
		SAMD00166530	DRX168343	DRR177817	CE-YAK006	University of Miyazaki/Okinawa Churashima Foundation Reseach Center
		SAMD00166531	DRX168344	DRR177818	OTSH02	University of Miyazaki
		SAMD00166532	DRX168345	DRR177819	CKA01	University of Miyazaki
		SAMD00166533	DRX168346	DRR177820	CKF02	University of Miyazaki
		SAMD00166534	DRX168347	DRR177821	CKF05	University of Miyazaki
		SAMD00166535	DRX168348	DRR177822	CKF06	University of Miyazaki
		SAMD00166536	DRX168349	DRR177823	CKF07	University of Miyazaki
		SAMD00166537	DRX168350	DRR177824	CKF09	University of Miyazaki
		SAMD00166538	DRX168351	DRR177825	CKF10	University of Miyazaki
		SAMD00166539	DRX168352	DRR177826	CKF18	University of Miyazaki
		SAMD00166540	DRX168353	DRR177827	CKF-Q-O	University of Miyazaki
		SAMD00166541	DRX168354	DRR177828	CK-IOU002	University of Miyazaki/Okinawa Churashima Foundation Reseach Center
		SAMD00166542	DRX168355	DRR177829	CK-IOU003	University of Miyazaki/Okinawa Churashima Foundation Reseach Center
		SAMD00166543	DRX168356	DRR177830	CK-IOU004	University of Miyazaki/Okinawa Churashima Foundation Reseach Center
		SAMD00166544	DRX168357	DRR177831	CK-IOU006	University of Miyazaki/Okinawa Churashima Foundation Reseach Center
		SAMD00166545	DRX168358	DRR177832	CK-IOU007	University of Miyazaki/Okinawa Churashima Foundation Reseach Center
		SAMD00166546	DRX168359	DRR177833	CKSH01	University of Miyazaki/Shikoku Marine Life Laboratory
		SAMD00166547	DRX168360	DRR177834	CKSH02	University of Miyazaki/Shikoku Marine Life Laboratory
		SAMD00166548	DRX168361	DRR177835	CKSH03	University of Miyazaki/Shikoku Marine Life Laboratory
		SAMD00166549	DRX168362	DRR177836	CKSH05	University of Miyazaki/Shikoku Marine Life Laboratory
		SAMD00166550	DRX168363	DRR177837	CKSH06	University of Miyazaki/Shikoku Marine Life Laboratory
		SAMD00166551	DRX168364	DRR177838	CKSH07	University of Miyazaki/Shikoku Marine Life Laboratory
		SAMD00166552	DRX168365	DRR177839	CKSH08	University of Miyazaki/Shikoku Marine Life Laboratory
		SAMD00166553	DRX168366	DRR177840	CKSH09	University of Miyazaki/Shikoku Marine Life Laboratory
		SAMD00166554	DRX168367	DRR177841	CKSH10	University of Miyazaki/Shikoku Marine Life Laboratory
		SAMD00166555	DRX168368	DRR177842	CKSH11	University of Miyazaki/Shikoku Marine Life Laboratory
		SAMD00166556	DRX168369	DRR177843	CKSH12	University of Miyazaki/Shikoku Marine Life Laboratory
		SAMD00166557	DRX168370	DRR177844	CKSH15	University of Miyazaki/Shikoku Marine Life Laboratory
		SAMD00166558	DRX168371	DRR177845	CKSH16	University of Miyazaki/Shikoku Marine Life Laboratory
		SAMD00166559	DRX168372	DRR177846	CKSH17	University of Miyazaki/Shikoku Marine Life Laboratory
		SAMD00166560	DRX168373	DRR177847	CKSH18	University of Miyazaki/Shikoku Marine Life Laboratory
		SAMD00166561	DRX168374	DRR177848	CKSH19	University of Miyazaki/Shikoku Marine Life Laboratory
		SAMD00166562	DRX168375	DRR177849	CKSH20	University of Miyazaki/Shikoku Marine Life Laboratory
		SAMD00166563	DRX168376	DRR177850	CKSH21	University of Miyazaki/Shikoku Marine Life Laboratory
		SAMD00166564	DRX168377	DRR177851	CKSH22	University of Miyazaki/Shikoku Marine Life Laboratory
		SAMD00166565	DRX168378	DRR177852	CKSH23	University of Miyazaki/Shikoku Marine Life Laboratory
		SAMD00166566	DRX168379	DRR177853	CKSH24	University of Miyazaki/Shikoku Marine Life Laboratory
		SAMD00166567	DRX168380	DRR177854	CKSH25	University of Miyazaki/Shikoku Marine Life Laboratory
		SAMD00166568	DRX168381	DRR177855	CKSH27	University of Miyazaki/Shikoku Marine Life Laboratory
		SAMD00166569	DRX168382	DRR177856	CKSH28	University of Miyazaki/Shikoku Marine Life Laboratory
		SAMD00166570	DRX168383	DRR177857	CKSH29	University of Miyazaki/Shikoku Marine Life Laboratory
		SAMD00166571	DRX168384	DRR177858	CKSH46	University of Miyazaki/Shikoku Marine Life Laboratory
		SAMD00166572	DRX168385	DRR177859	CK-TAK001	University of Miyazaki/Okinawa Churashima Foundation Reseach Center
		SAMD00166573	DRX168386	DRR177860	CK-TAK002	University of Miyazaki/Okinawa Churashima Foundation Reseach Center
		SAMD00166574	DRX168387	DRR177861	CK-TAK003	University of Miyazaki/Okinawa Churashima Foundation Reseach Center
		SAMD00166575	DRX168388	DRR177862	CK-TAK004	University of Miyazaki/Okinawa Churashima Foundation Reseach Center
		SAMD00166576	DRX168389	DRR177863	CK-TAK005	University of Miyazaki/Okinawa Churashima Foundation Reseach Center
		SAMD00166577	DRX168390	DRR177864	CK-TAK006	University of Miyazaki/Okinawa Churashima Foundation Reseach Center
		SAMD00166578	DRX168391	DRR177865	CK-TAK008	University of Miyazaki/Okinawa Churashima Foundation Reseach Center
		SAMD00166579	DRX168392	DRR177866	CK-TNG002	University of Miyazaki/Okinawa Churashima Foundation Reseach Center
		SAMD00166580	DRX168393	DRR177867	CKYN01	University of Miyazaki/Shikoku Marine Life Laboratory
		SAMD00166581	DRX168394	DRR177868	CKYN02	University of Miyazaki/Shikoku Marine Life Laboratory
		SAMD00166582	DRX168395	DRR177869	G1351	University of Miyazaki/Shikoku Marine Life Laboratory
		SAMD00166583	DRX168396	DRR177870	G1369	University of Miyazaki/Shikoku Marine Life Laboratory
		SAMD00166584	DRX168397	DRR177871	G1416	University of Miyazaki/Shikoku Marine Life Laboratory
		SAMD00166585	DRX168398	DRR177872	G1417	University of Miyazaki/Shikoku Marine Life Laboratory
		SAMD00166586	DRX168399	DRR177873	G1419	University of Miyazaki/Shikoku Marine Life Laboratory
		SAMD00166587	DRX168400	DRR177874	G1420	University of Miyazaki/Shikoku Marine Life Laboratory
		SAMD00166588	DRX168401	DRR177875	G1426	University of Miyazaki/Shikoku Marine Life Laboratory
		SAMD00166589	DRX168402	DRR177876	G1429	University of Miyazaki/Shikoku Marine Life Laboratory
		SAMD00166590	DRX168403	DRR177877	OTSH03	University of Miyazaki/Shikoku Marine Life Laboratory
		SAMD00166591	DRX168404	DRR177878	OTSH04	University of Miyazaki/Shikoku Marine Life Laboratory
